# Supplementary material for: Physicochemical, morpho-structural, and biological characterization of polysaccharides from three Polygonatum spp
Source: Royal Society of Chemistry journal article supplement (doi:10.1039/d1ra07214e), 2021-01-01
Supplement: d1ra07214e1.pdf [file d1ra07214e1.pdf]

### Supporting information

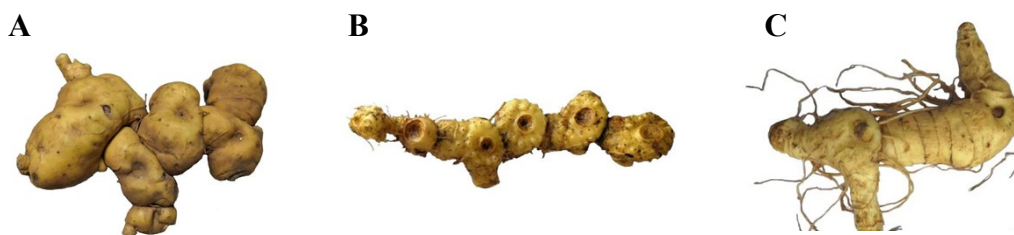

Fig.S1. The rhizomes of *P. kingianum* (A) 、 *P. cyrtonema* (B) 、 *P. sibiricum* (C).

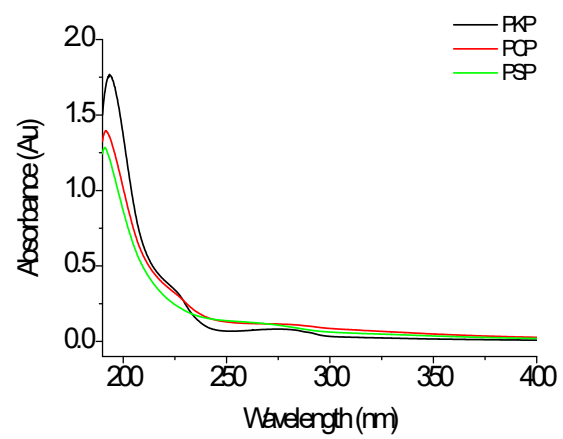

Fig.S2. UV spectrum of PCP, PKP and PSP.

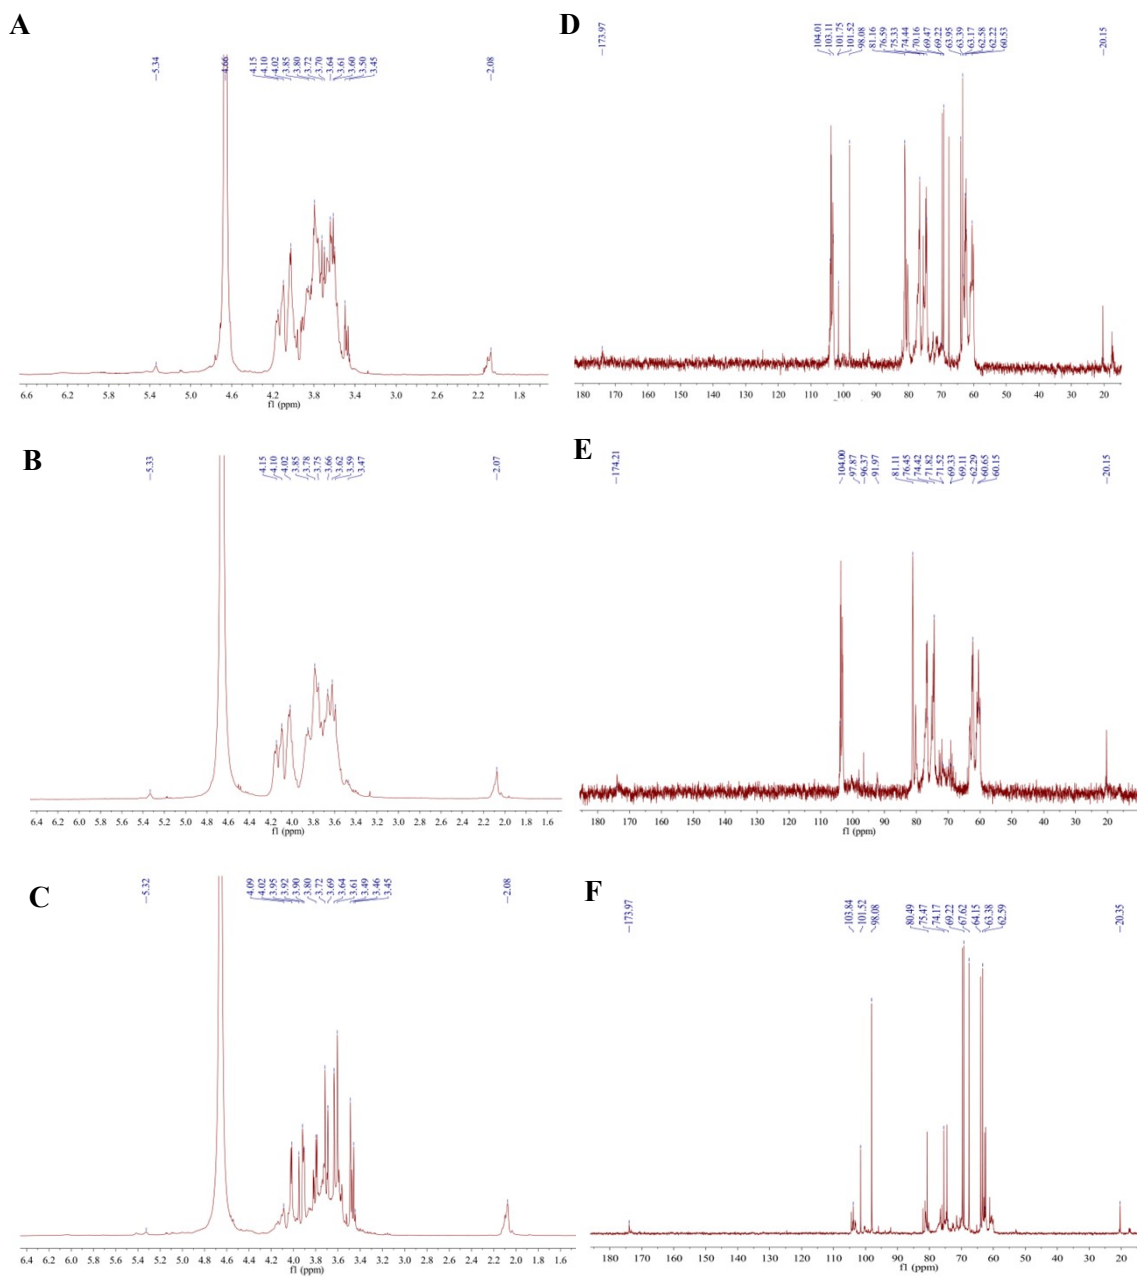

Fig.S3.  $^1\text{H}$  NMR (A-C) and  $^{13}\text{C}$  NMR (D-F) spectra of PKP (A and D), PCP (B and E), and PSP (C and F), respectively.

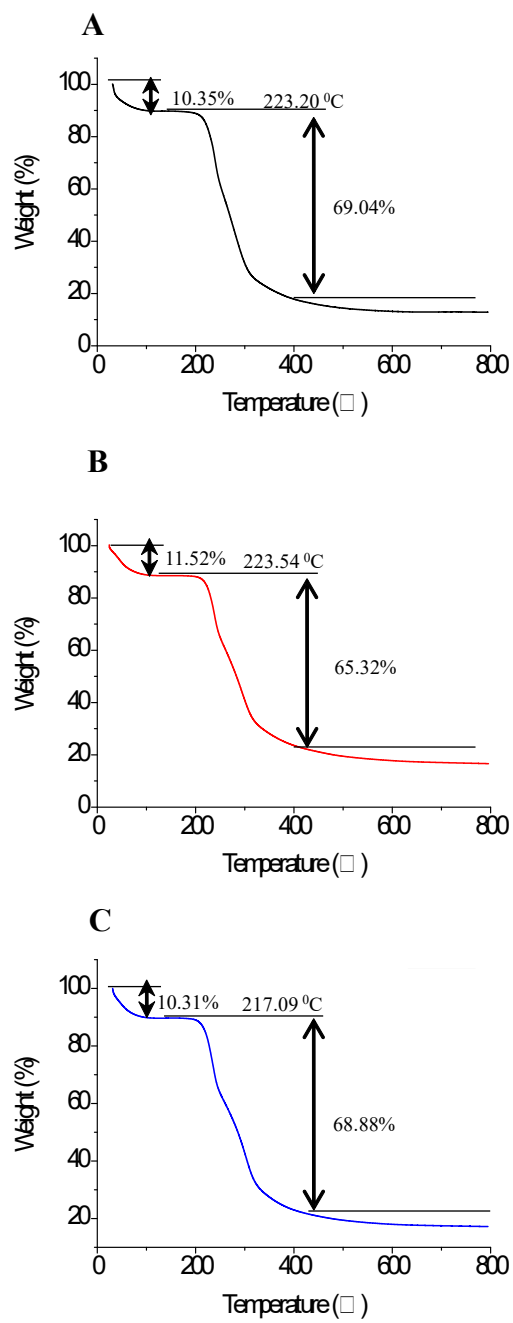

Fig.S4. TGA curves of PKP (A), PCP (B), and PSP (C).
